# Supplementary material
Source: PubMed Central journal article supplement (PMC3437237)

# Supplemental Figure 1

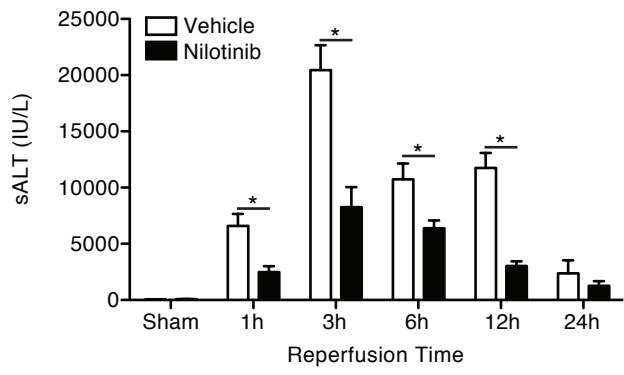

Supplement: NIHMS380906-supplement-01.pdf [file NIHMS380906-supplement-01.pdf]

# Supplemental Figure 2

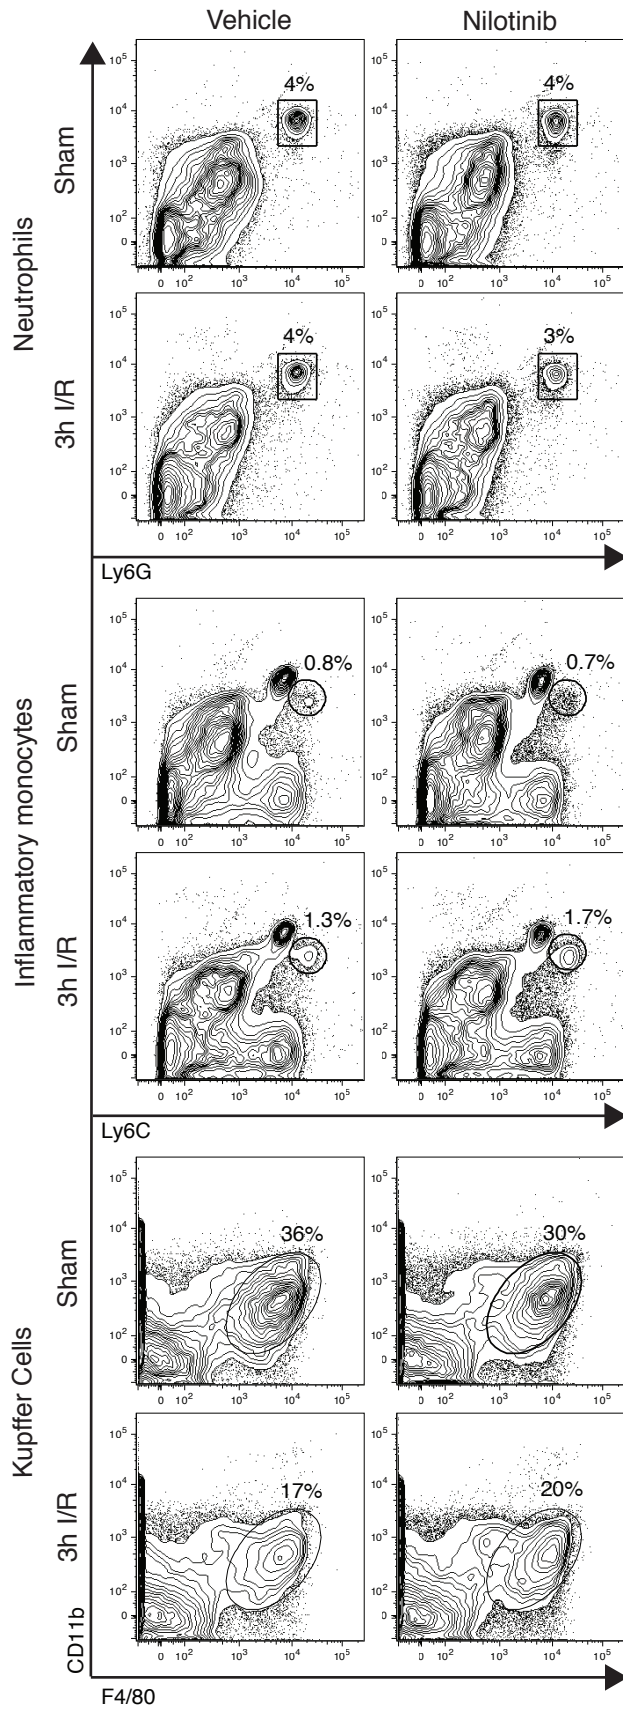

Supplement: NIHMS380906-supplement-02.pdf [file NIHMS380906-supplement-02.pdf]
